# Supplementary material for: Comprehensive Prostate Fluid-Based Spectral Libraries for Enhanced Protein Detection in Urine
Source: PubMed Central journal article supplement — J Proteome Res. 2024 Apr 5;23(5):1768–78. doi: 10.1021/acs.jproteome.4c00009 (PMC11077481; doi:10.1021/acs.jproteome.4c00009), 2024-04-05
Supplement: pr4c00009_si_001.pdf [file pr4c00009_si_001.pdf]

## Supporting Information

# Comprehensive prostate fluid-based spectral libraries for enhanced protein detection in urine.

*Annie Ha<sup>1,2,‡</sup>, Amanda Khoo<sup>1,2,‡</sup>, Vladimir Ignatchenko<sup>2</sup>, Shahbaz Khan<sup>2</sup>, Matthew Waas<sup>2</sup>, Danny Vesprini<sup>3,4</sup>, Stanley K Liu<sup>1,3,4</sup>, Julius O Nyalwidhe<sup>5,6</sup>, Oliver John Semmes<sup>5,6</sup>, Paul C Boutros<sup>7,8,9,10,11,12,13</sup>, Thomas Kislinger<sup>1,2\*</sup>.*

‡These authors contributed equally.

<sup>1</sup>Department of Medical Biophysics, University of Toronto, Toronto, Ontario, Canada, M5G 1L7.

<sup>2</sup>Princess Margaret Cancer Centre, University Health Network, Toronto, Ontario, M5G 2C1, Canada.

<sup>3</sup>Department of Radiation Oncology, University of Toronto, Toronto, Ontario, M5T 1P5, Canada.

<sup>4</sup>Odette Cancer Research Program, Sunnybrook Research Institute, Toronto, Ontario, M4N 3M5, Canada.

<sup>5</sup>Leroy T. Canoles Jr. Cancer Research Center, Eastern Virginia Medical School, Norfolk, Virginia 23501, USA.

<sup>6</sup> Department of Microbiology and Molecular Cell Biology, Eastern Virginia Medical School, Norfolk, Virginia 23501, USA.

<sup>7</sup> Department of Human Genetics, University of California, Los Angeles, Los Angeles, California 90095, USA.

<sup>8</sup> Department of Urology, University of California, Los Angeles, Los Angeles, California 90095, USA.

<sup>9</sup> Institute for Precision Health, David Geffen School of Medicine, University of California, Los Angeles, Los Angeles, California 90095, USA.

<sup>10</sup> Eli and Edythe Broad Stem Cell Research Center, University of California, Los Angeles, CA 90095, USA.

<sup>11</sup> Broad Stem Cell Research Center, University of California, Los Angeles, California, 90095, USA.

<sup>12</sup> Jonsson Comprehensive Cancer Center, David Geffen School of Medicine, University of California, Los Angeles, Los Angeles, California 90024, USA.

<sup>13</sup> Department of Human Genetics, University of California, Los Angeles, Los Angeles, California 90095, USA.

**Corresponding Author**

\*Thomas Kislinger

## Table of Contents

| Content                                                                                     | Page |
|---------------------------------------------------------------------------------------------|------|
| Figure S1. Comparisons between DIA-MS data analysis approaches                              | S-3  |
| Figure S2. Comparisons between DIA- and DDA-MS on matched EPS-urine samples.                | S-5  |
| Figure S3. Evaluation of the sample-relevant spectral libraries.                            | S-6  |
| Figure S4. Detection results of the lib-EPS, DPHLv2, and library-free.                      | S-8  |
| Table S1. Clinical information of the prostate cancer patients for EPS-urine cohort. (XLSX) |      |
| Table S2. Detailed optimization parameters for DIA-MS methods tested. (XLSX)                |      |

### Figure S1

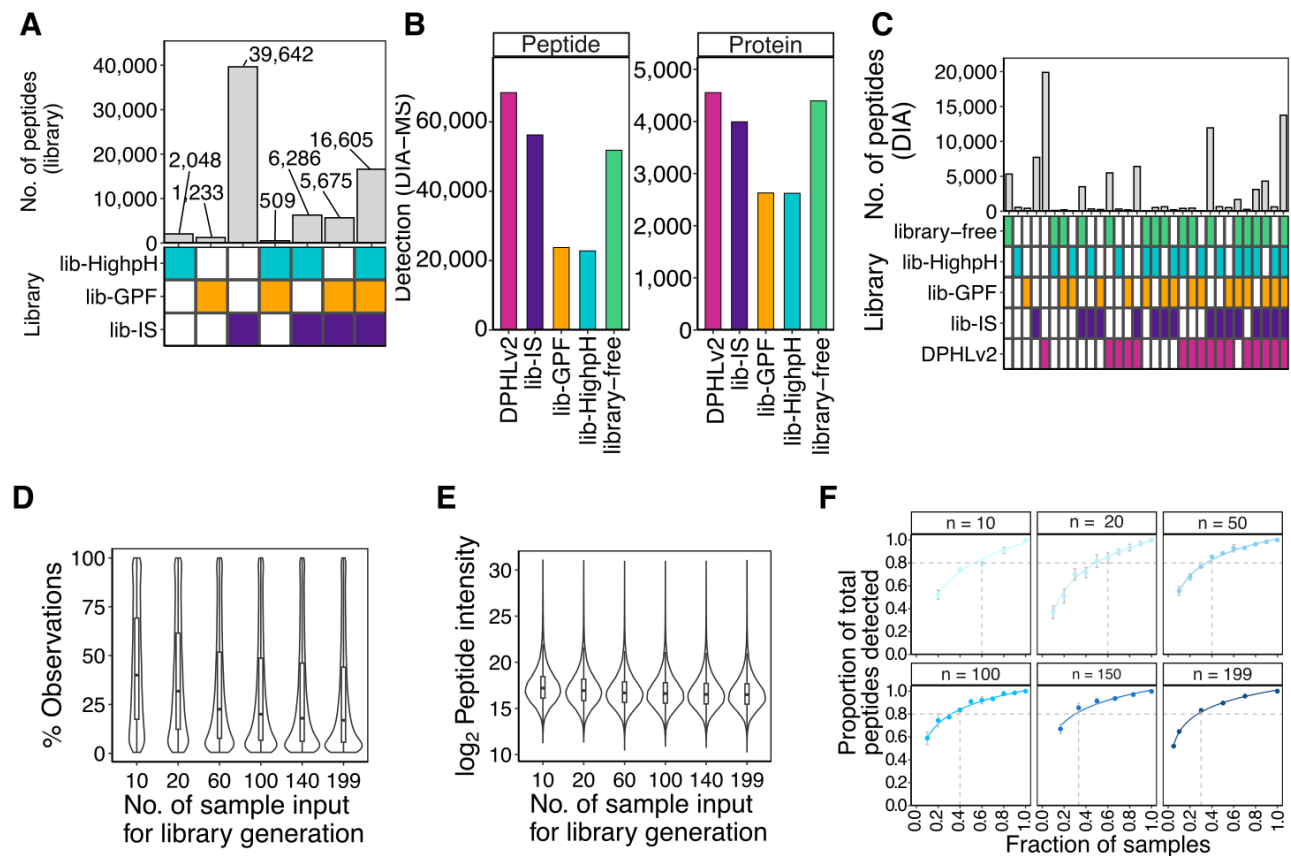

**Figure S1.** Comparisons between DIA-MS data analysis approaches. **(A)** Intersection of peptides in the sample-specific generated spectral libraries. **(B)** Detection rates **(C)** Intersection of peptides

of the EPS-urine DIA-MS data searched against each sample-specific spectral libraries, DPHLv2, and library-free approach. **(D)** Percent observations of peptides detected in the EPS-urine DIA-MS data when searched against each subsampled library. **(E)** Boxplot of the  $\log_2$  peptide intensities of peptides detected. **(F)** Proportion of total peptides detected in DIA-MS data of each subset cohort using subsampled spectral libraries from DDA-MS of the corresponding subset cohort.

**Figure S2**

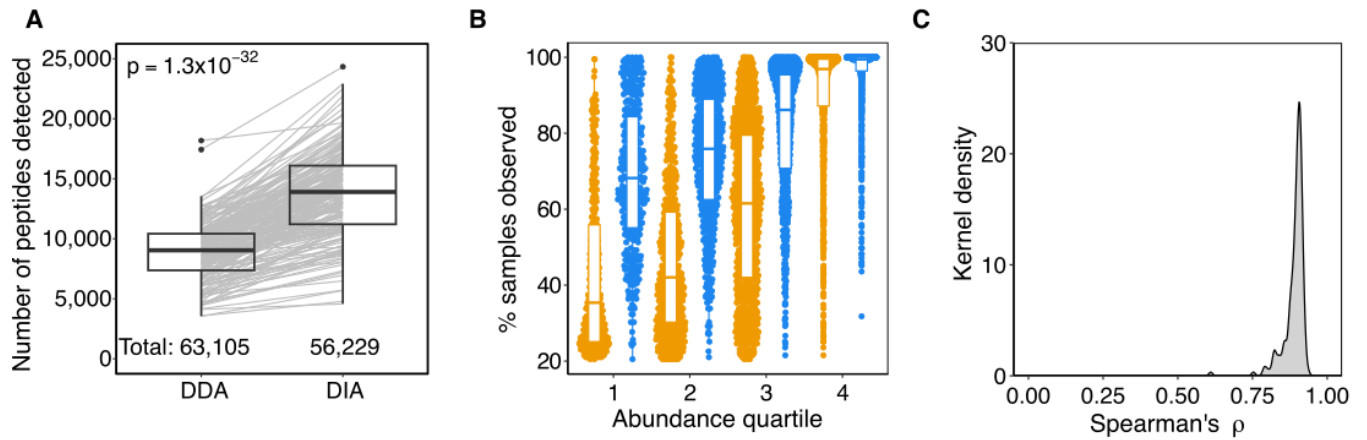

**Figure S2.** Comparisons between DIA- and DDA-MS on matched EPS-urine samples. **(A)** Number of peptides detected per sample with P-value calculated by Wilcoxon's signed-rank test. **(B)** Percent samples observed for detected proteins in both DIA- and DDA-MS, stratified by abundance quartile quantified by DDA-MS. **(C)** Spearman's correlation of run-to-run protein intensity correlation.

**Figure S3**

**A**

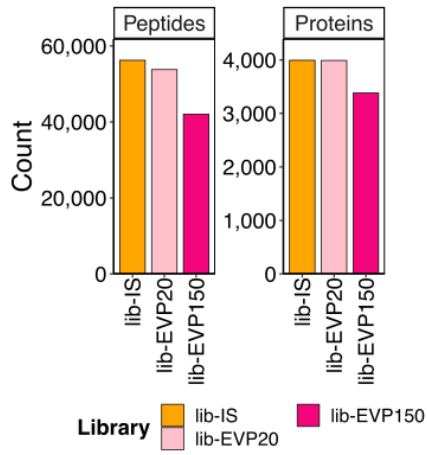

**B**

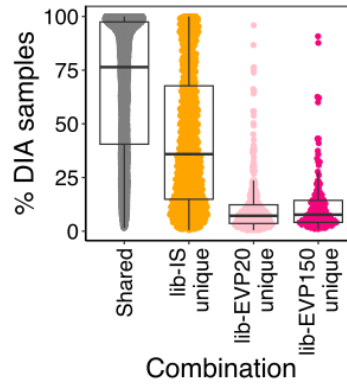

**C**

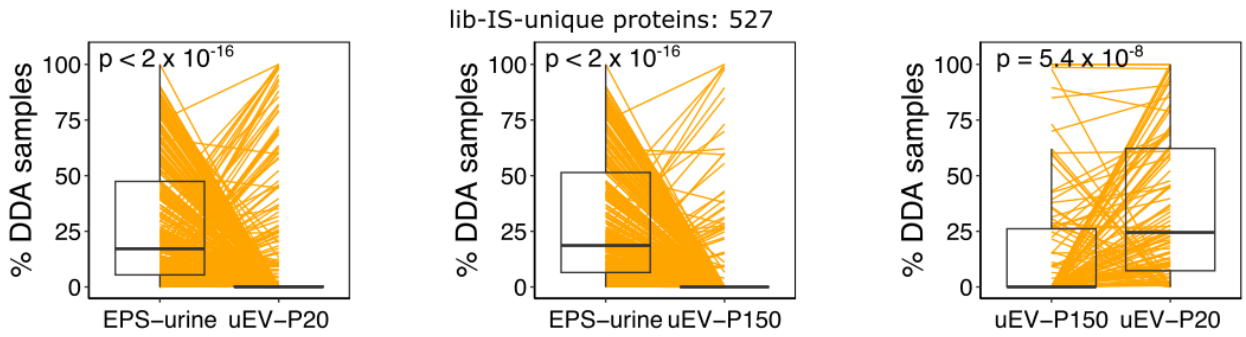

**D**

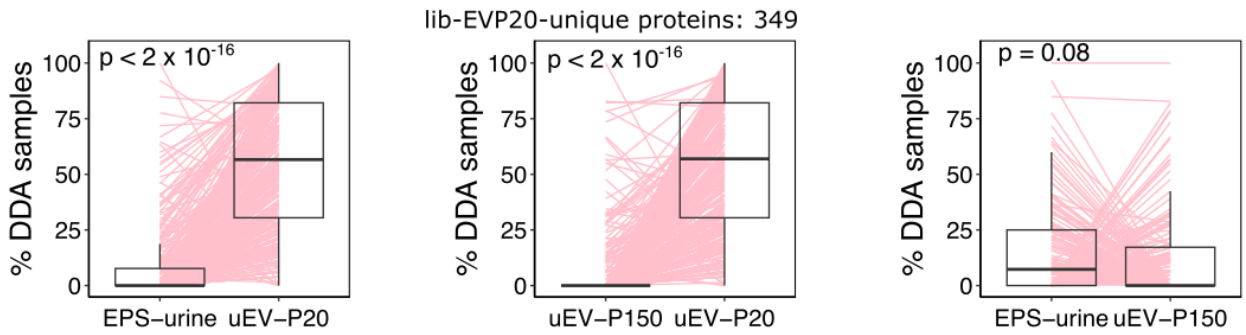

**E**

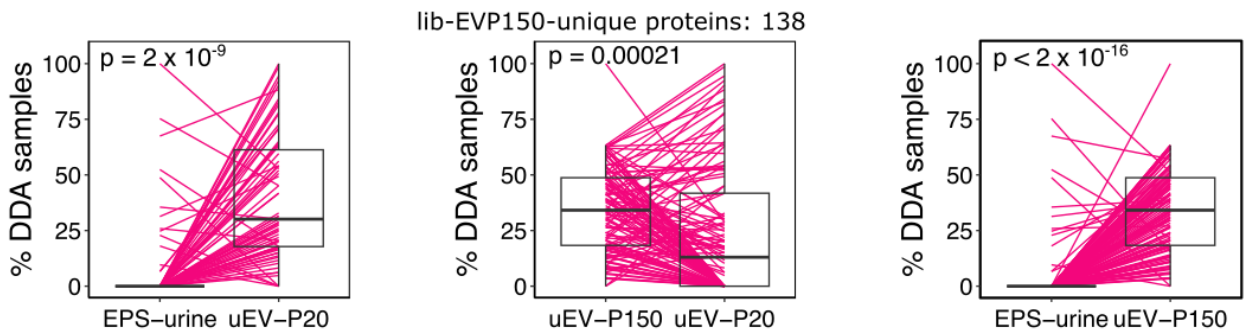

**Figure S3.** Evaluation of the sample-relevant spectral libraries. **(A)** Library size of the generated spectral libraries. **(B)** Percent observation of proteins detected by all libraries, or uniquely by each of the spectral libraries. **(C-E)** Percent observations of uniquely detected proteins by each spectral library in the corresponding DDA-MS samples of EPS-urine fractions.

**Figure S4**

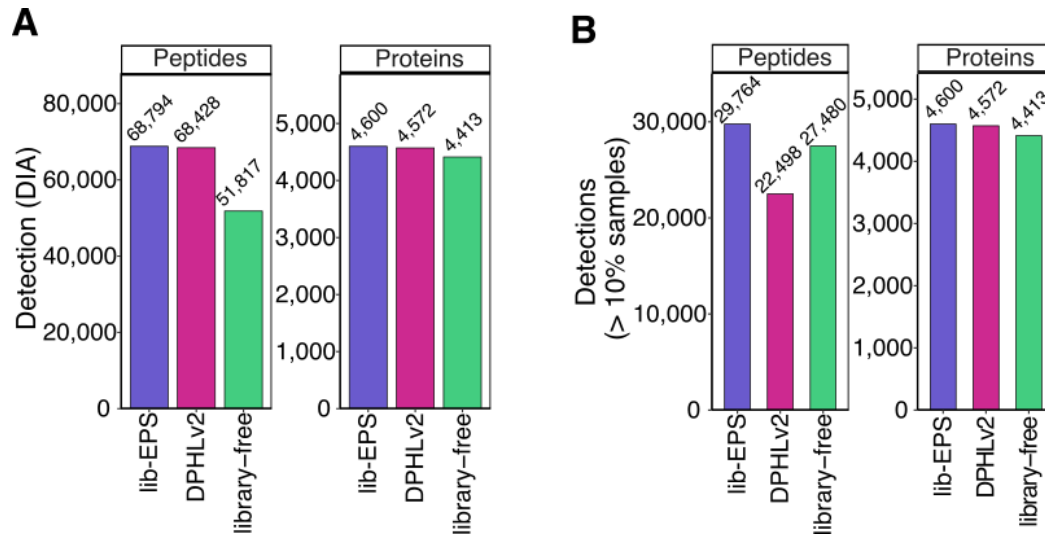

**Figure S4.** Detection results of the lib-EPS library against DPHLv2 and library free. **(A)** Total number of peptide and proteins detected with each approach. **(B)** Number of peptides and proteins detected in more than 10% of samples with each approach.
